# Supplementary material
Source: publisher figshare collection journal article supplement (https://frontiersin.figshare.com/ndownloader/files/27682605)
Supplement: Supplementary file 1 [file 27682605]

**Appendix:**

**Table SA2 Testing Data**

| NO. | *Sign* | | | | | | | | | | | | Fault |
| --- | --- | --- | --- | --- | --- | --- | --- | --- | --- | --- | --- | --- | --- |
| 1 | 96.3 | 82.3 | 1.3 | 0.3 | 10.0 | 22.0 | 25.0 | 21.0 | 14.0 | 15.0 | 30.5 | 33.7 | 0 |
| 2 | 109.7 | 96.4 | 5.7 | 1.5 | 32.0 | 42.0 | 165.0 | 114.0 | 56.0 | 54.0 | 17.0 | 132.0 | 0 |
| 3 | 91.5 | 81.5 | 0.8 | 0.3 | 5.4 | 7.5 | 17.0 | 12.4 | 12.3 | 12.5 | 21.5 | 19.1 | 0 |
| 4 | 96.6 | 85.1 | 1.5 | 0.4 | 8.3 | 14.4 | 22.5 | 16.0 | 15.0 | 13.0 | 28.0 | 25.7 | 0 |
| 5 | 106 | 96.8 | 4.7 | 1.5 | 22.0 | 30.0 | 95.0 | 74.0 | 44.0 | 42.0 | 107.0 | 91.6 | 1 |
| 6 | 93.1 | 78.2 | 1.0 | 0.2 | 6.2 | 27.0 | 14.5 | 5.1 | 15.3 | 4.3 | 22.0 | 7.2 | 0 |
| 7 | 92.8 | 74.5 | 1.0 | 0.1 | 6.3 | 3.2 | 11.5 | 5.6 | 17.0 | 4.1 | 22.2 | 7.5 | 0 |
| 8 | 93.7 | 76.7 | 1.1 | 0.2 | 6.0 | 4.4 | 12.5 | 6.6 | 20.4 | 5.4 | 24.5 | 9.5 | 0 |
| 9 | 94.8 | 77.6 | 1.2 | 0.2 | 6.2 | 3.5 | 15.0 | 4.6 | 20.0 | 5.4 | 26.5 | 8.1 | 0 |
| 10 | 92.0 | 70.9 | 0.8 | 0.1 | 8.3 | 1.0 | 17.0 | 3.4 | 21.0 | 1.6 | 29.0 | 4.2 | 0 |
| 11 | 93.5 | 75.5 | 1.0 | 0.1 | 6.1 | 2.7 | 11.0 | 5.3 | 19.0 | 4.6 | 23.1 | 7.6 | 0 |
| 12 | 94.3 | 75.3 | 1.1 | 0.1 | 6.4 | 2.4 | 12.0 | 5.3 | 11.2 | 4.4 | 17.4 | 7.5 | 0 |
| 13 | 101.0 | 101.0 | 2.5 | 2.5 | 5.0 | 16.0 | 17.0 | 25.3 | 9.2 | 26.4 | 20.0 | 40.5 | 0 |
| 14 | 105.0 | 96.1 | 4.5 | 1.4 | 26.0 | 32.0 | 90.0 | 80.0 | 46.0 | 45.0 | 105.0 | 98.4 | 1 |
| 15 | 100.0 | 88.0 | 2.0 | 0.6 | 13.0 | 18.0 | 56.0 | 33.0 | 30.0 | 26.0 | 64.5 | 47.5 | 1 |
| 16 | 102.0 | 103.0 | 2.7 | 3.1 | 20.0 | 26.0 | 76.0 | 75.0 | 37.0 | 51.0 | 87.1 | 95.0 | 1 |
